# Supplementary material for: A conjugated microporous polymer film fabricated by in situ electro-chemical deposition as a hole transporting layer in organic photovoltaics
Source: Royal Society of Chemistry journal article supplement (doi:10.1039/c8tc02933d), 2018-01-01
Supplement: c8tc02933d1.pdf [file c8tc02933d1.pdf]

## Supporting Information

### A Conjugated Microporous Polymer Film by in-situ Electro-chemical Deposition as Hole Transporting Layers in Organic Photovoltaics

Shuo Yang, Chengdong Yang, Xuning Zhang, Zhong Zheng, Shiqing Bi, Yuan Zhang,  
Huiqiong Zhou\*

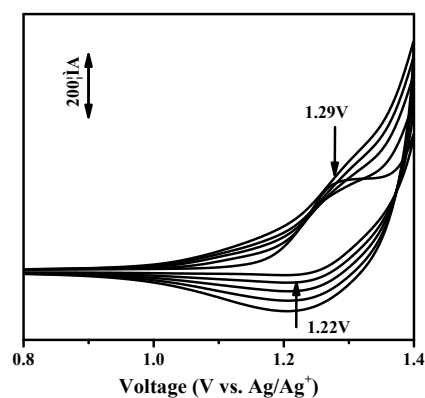

**Fig. S1** CV profiles of the precursor solution in acetonitrile/DCM (1:4 v/v) in the presence of the TBAP as supporting electrolyte at ambient temperature with the scan rate of 0.05 V/s.

**Table S1** Performances of devices based on CMPs films  
with different monomer solution concentration  
(Cut-off potential: 1.4 V, scan cycles: 2 cycles)

| Concentration/<br>mmol | $V_{oc}/V$ | $J_{sc}/mA \cdot cm^{-2}$ | FF/%  | PCE/% |
|------------------------|------------|---------------------------|-------|-------|
| 0.3                    | 0.70       | 16.07                     | 55.47 | 6.24  |
| 0.4                    | 0.80       | 16.47                     | 67.53 | 8.85  |
| 0.5                    | 0.72       | 16.22                     | 54.48 | 6.36  |

**Table S2** Performances of devices based on CMPs films  
with different cut-off potential  
(Concentration: 0.4 mmol, scan cycles: 2 cycles)

| Potential/V | $V_{oc}$ | $J_{sc}/\text{mA}\cdot\text{cm}^{-2}$ | FF/%  | PCE/% |
|-------------|----------|---------------------------------------|-------|-------|
| 1.3         | 0.74     | 15.00                                 | 58.23 | 6.47  |
| 1.4         | 0.80     | 15.71                                 | 68.40 | 8.55  |
| 1.5         | 0.66     | 0.37                                  | 14.62 | 0.035 |

**Table S3** Performances of devices based on CMPs films  
with different scan cycles  
(Concentration: 0.4 mmol, cut-off potential: 1.4 V)

| Scan cycles | $V_{oc}$ | $J_{sc}/\text{mA}\cdot\text{cm}^{-2}$ | FF/%  | PCE/% |
|-------------|----------|---------------------------------------|-------|-------|
| 0           | 0.48     | 16.55                                 | 52.95 | 4.21  |
| 1           | 0.74     | 15.24                                 | 55.93 | 6.31  |
| 2           | 0.80     | 16.14                                 | 70.64 | 8.90  |
| 3           | 0.63     | 15.64                                 | 53.09 | 6.48  |
